# Supplementary material for: Space-confined growth of Ag3PO4nanoparticles within WS2sheets: Ag3PO4/WS2composites as visible-light-driven photocatalysts for decomposing dyes
Source: Royal Society of Chemistry journal article supplement (doi:10.1039/c5ta04422g), 2015-01-01
Supplement: c5ta04422g1.pdf [file c5ta04422g1.pdf]

## Space-confined growth of $\text{Ag}_3\text{PO}_4$ nano particles within $\text{WS}_2$ sheets: $\text{Ag}_3\text{PO}_4$ / $\text{WS}_2$ composite as a visible-light-driven photocatalyst for decomposing dyes

Yu Hongjian<sup>a</sup>, Yu Yong<sup>b</sup>, Liu Jianghao<sup>c</sup>, Ma Peiyan<sup>b,\*</sup>, Wang Yucheng<sup>a</sup>, Zhang Fan<sup>a</sup> and Fu Zhengyi<sup>a,\*</sup>

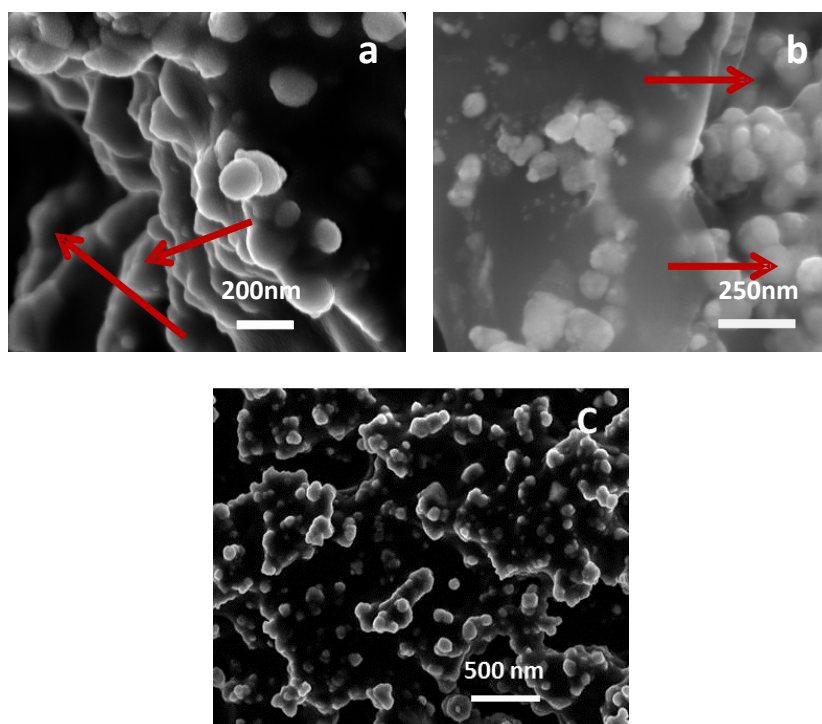

Fig.S1 FESEM images of AW0.01 a) without ultrasonic treatment (side); b) with high - power ultrasonic treatment; c) without ultrasonic treatment (top).

We detected the morphology of  $\text{Ag}_3\text{PO}_4$  / $\text{WS}_2$  composite (AW0.01) using FESEM. FESEM image of AW0.01 without ultrasonic treatment is shown in Fig.S1a. The results indicate that the layer- by -layer structure

consisted of nano  $\text{Ag}_3\text{PO}_4$  particles and  $\text{WS}_2$  sheets are formed. After high - power ultrasonic treatment (Fig.S1b),  $\text{Ag}_3\text{PO}_4$  nano particles sandwiched between  $\text{WS}_2$  sheets are still be observed. Fig.S1c shows the morphology of AW0.01 from the top (without ultrasonic treatment). Though slight amounts of  $\text{Ag}_3\text{PO}_4$  nano particles are assembled together, most of the nano particles are uniformly dispersed on the surface of  $\text{WS}_2$  sheets.

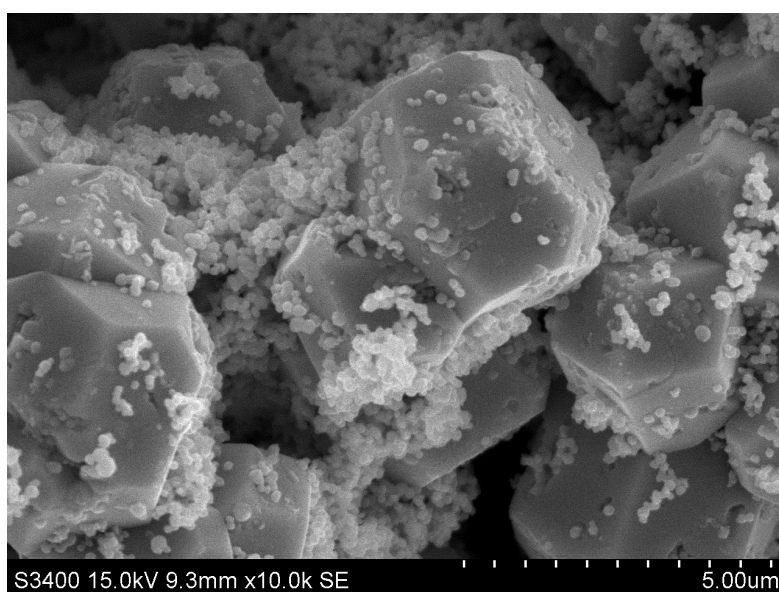

Fig. S2 The SEM image of pure  $\text{Ag}_3\text{PO}_4$ .

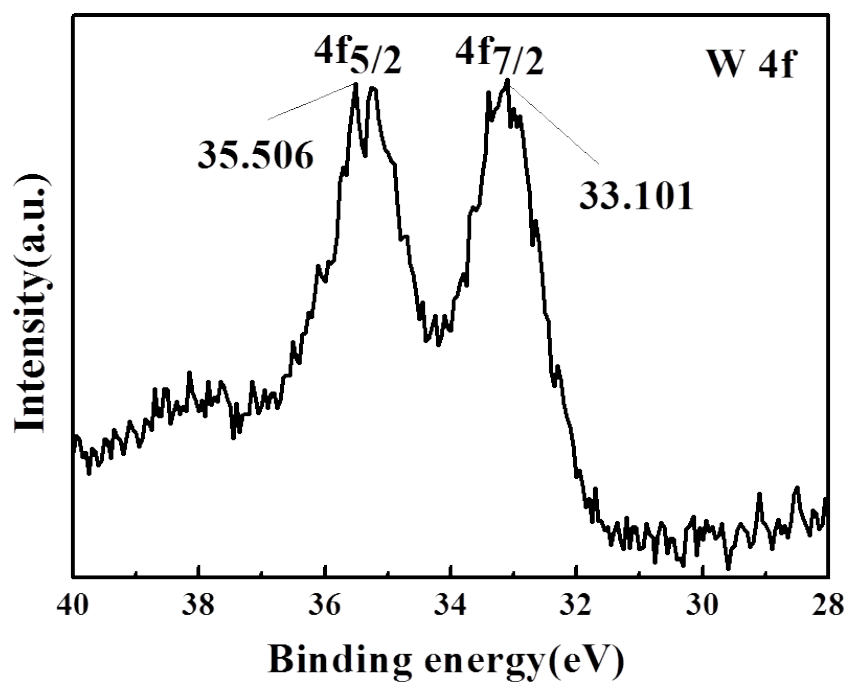

Fig.S3 The high-resolution XPS spectrum of W4f.

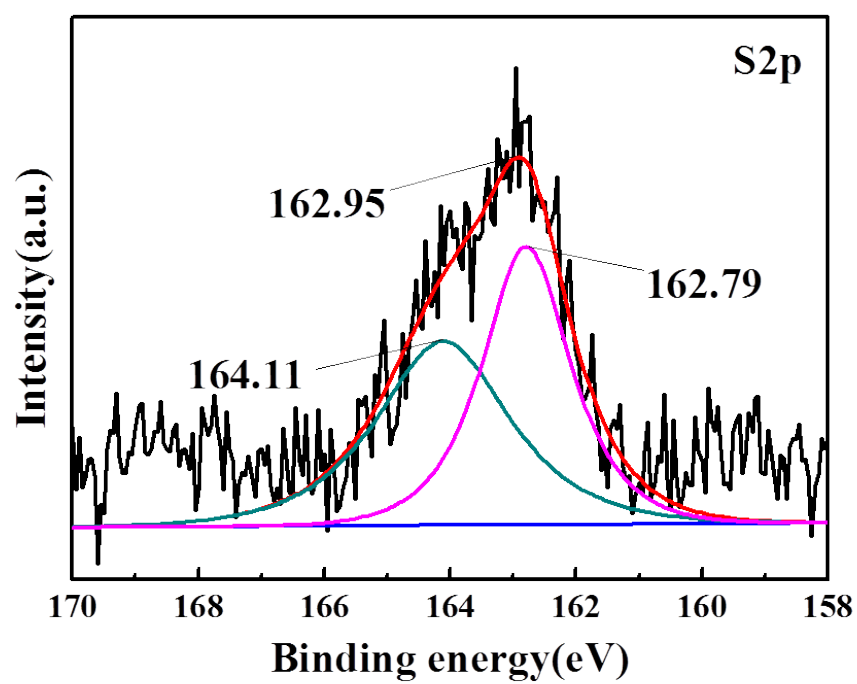

Fig. S4 The high-resolution XPS spectrum of S2p.

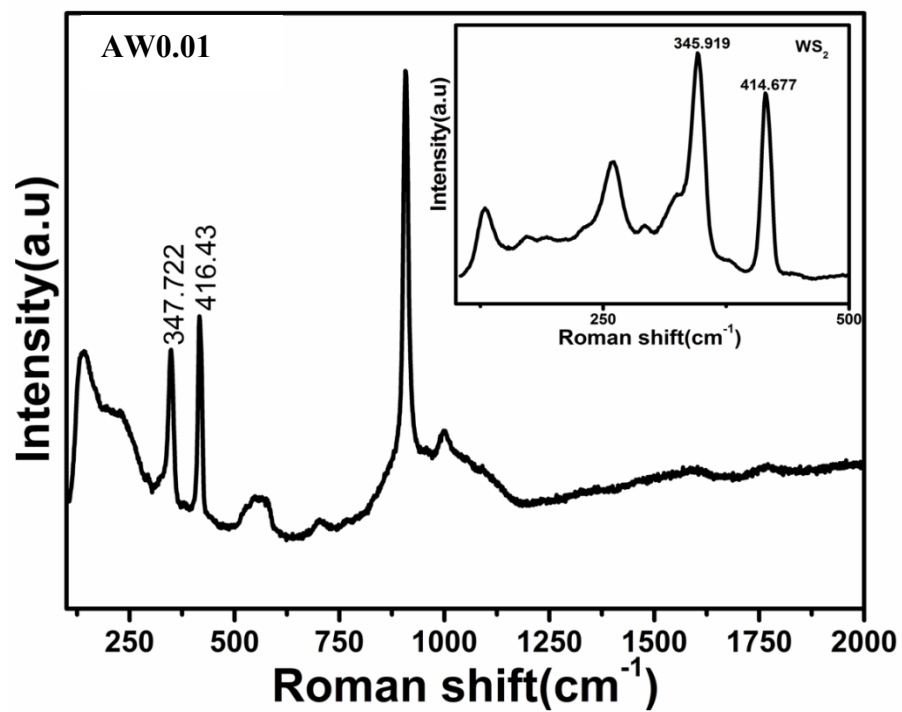

Fig.S5 Raman spectra of pure WS<sub>2</sub> and AW0.01.

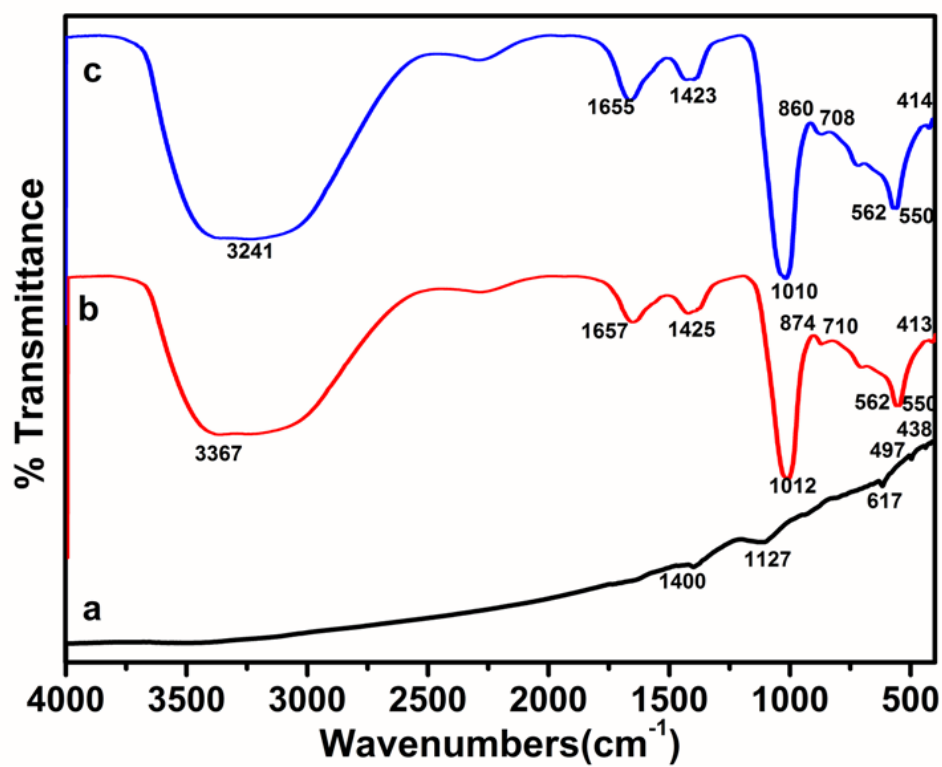

Fig.S6 FTIR spectra of a) WS<sub>2</sub> sheets, b) pure Ag<sub>3</sub>PO<sub>4</sub> and c) AW0.01.

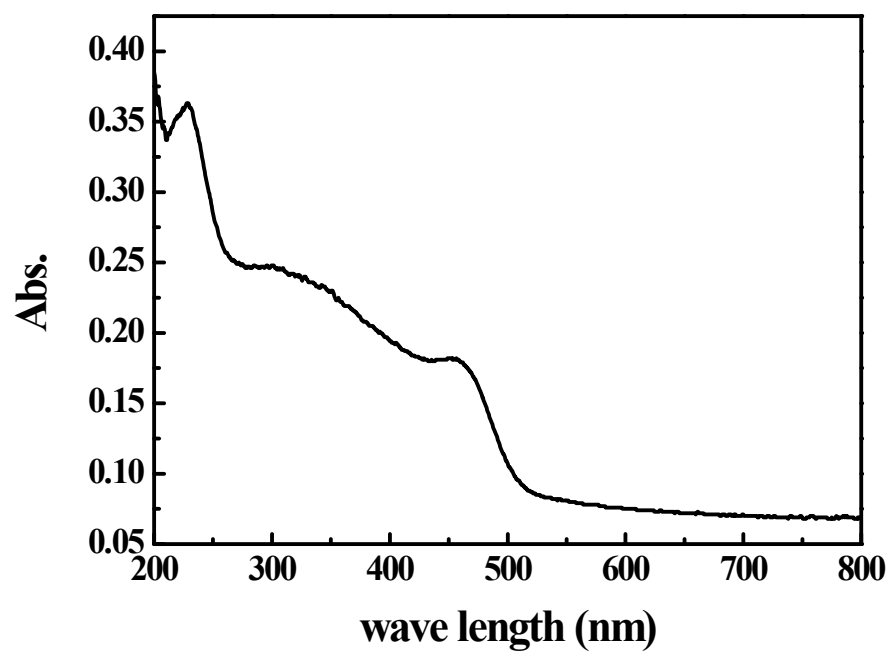

Fig.S7 UV-vis diffusive reflectance spectrum of pure  $\text{Ag}_3\text{PO}_4$ .

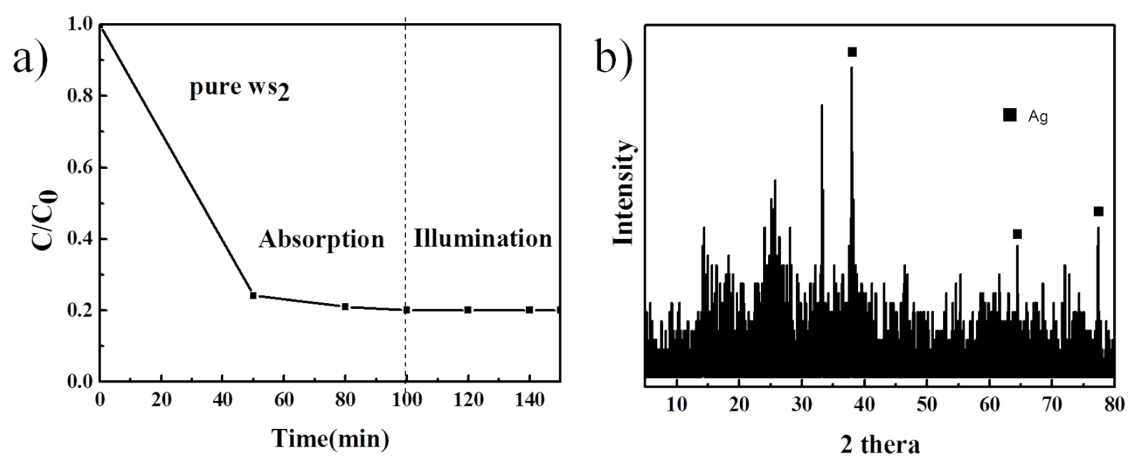

Fig.S8 (a) The absorption and degradation curves of  $WS_2$ ; (b) The XRD pattern of AW0.01 after four RhB degradation processes.



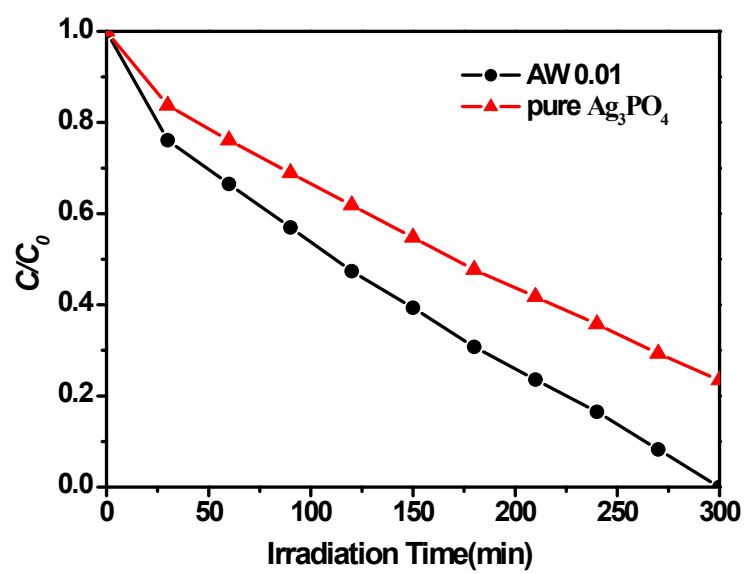

Fig. S9 Photocatalytic degradation curves of phenol solution over pure  $\text{Ag}_3\text{PO}_4$  and AW0.01.

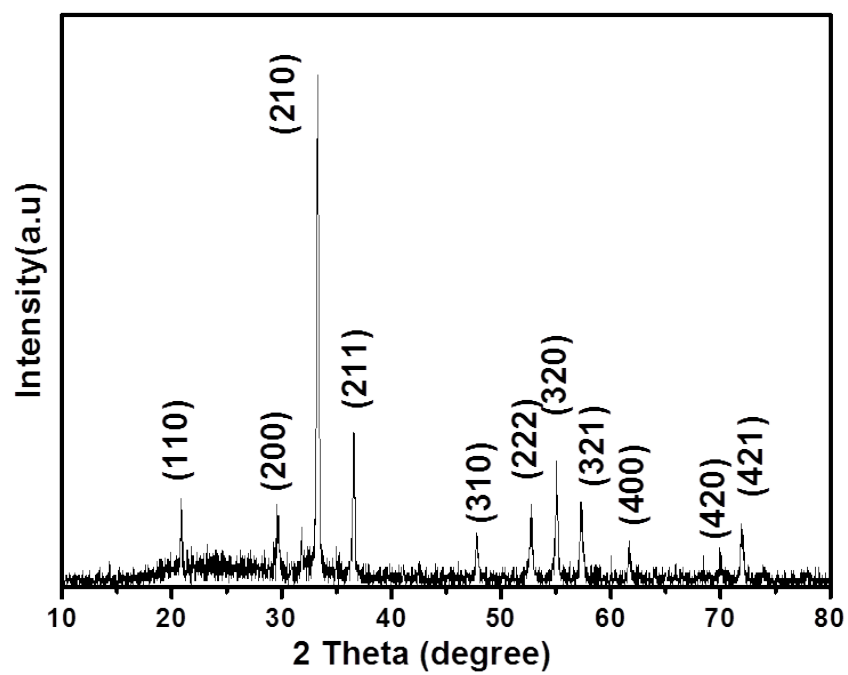

Fig.S10 XRD pattern of AW0.01 after 6- months storage.
